# Supplementary material for: Spatial and Temporal Variability in Prevalence Rates of Members of the Borrelia burgdorferi Species Complex in Ixodes ricinus Ticks in Urban, Agricultural and Sylvatic Habitats in Slovakia
Source: MDPI journal article supplement (doi:10.3390/microorganisms11071666), 2023-06-27
Supplement: s1 [file s1]

**Table S2** Prevalence of *Borrelia burgdorferi* s. l. and diversity of *Borrelia* species reported from Slovakia

| Site                    | Sample      | Prevalence (%)                 | ss  | g    | v    | a    | l   | s | b | coinf | Method         | Ref  |
|-------------------------|-------------|--------------------------------|-----|------|------|------|-----|---|---|-------|----------------|------|
| Slovakia (W, NS)        | A           | 3-13                           |     |      |      |      |     |   |   |       | DFM            | [33] |
| Bratislava (SW, U)      | M<br>F<br>T | 15.3-21.8<br>14.5-16.9<br>17.8 |     | +    |      |      |     |   |   |       | DFM            | [34] |
| Martinský les (SW, F)   | M<br>F<br>T | 56<br>42<br>49                 |     | 14   | 14   | 68   | 5   |   |   |       | IFA, PCR, RFLP | [35] |
| Košice (E, U)           | N<br>A<br>T | 9-11<br>15-19<br>2.1-28.4      | +   | +    |      | +    |     |   |   | +     | DFM, IB        | [36] |
| Košice (E, U)           | T           | 12.8-15.0                      |     |      |      |      |     |   |   |       | DFM            | [80] |
| Košice (E, U)           | N           | 11.1                           |     |      |      |      |     |   |   |       | DFM            | [81] |
|                         | A           | 12.7                           |     |      |      |      |     |   |   |       |                |      |
| Rimavská Sobota (E, U)  | N           | 14.3                           |     |      |      |      |     |   |   |       |                |      |
|                         | A           | 27.7                           |     |      |      |      |     |   |   |       |                |      |
| Michalovce (E, U)       | N           | 5.2                            |     |      |      |      |     |   |   |       |                |      |
|                         | A           | 8.3                            |     |      |      |      |     |   |   |       |                |      |
| Vranov (E, U)           | N           | 21.4                           |     |      |      |      |     |   |   |       |                |      |
|                         | A           | 13                             |     |      |      |      |     |   |   |       |                |      |
| Košice (E, U)           | T           | 38.3                           |     |      |      |      |     |   |   |       | PCR            | [82] |
| Pod. Biskupice (SW, SF) | N           | 21.5                           |     |      | 7.1  | 89.3 | 3.6 |   |   |       | PCR, RLB       | [20] |
|                         | A           | 31.8                           | 1.3 | 27.6 | 10.5 | 52.6 | 2.6 |   |   | 5.3   |                |      |
| Malacky (W, UP)         | N           | 18.7                           |     | 21.6 | 18.9 | 43.2 |     |   |   | 16.2  |                |      |
|                         | A           | 40.1                           | 1.7 | 20.3 | 20.3 | 49.1 |     |   |   | 8.5   |                |      |
| Záh. Ves (W, F)         | N           | 27.8                           | 6.7 | 20.0 | 13.3 | 60.0 |     |   |   |       |                |      |
| 1999                    | A           | 48.5                           | 2.1 | 5.2  | 8.3  | 61.4 | 4.2 |   |   | 18.7  |                |      |
| 2000                    | N           | 19.0                           |     | 6.1  | 45.4 | 48.5 |     |   |   |       |                |      |
|                         | A           | 49.4                           |     | 7.9  | 50.0 | 38.1 | 3.9 |   |   |       |                |      |
| Furča (E, F)            | N           | 1-13                           | +   | +    |      | +    |     |   | + | ***   | PCR, RFLP      | [37] |
|                         | A           | 16-23                          | +   | +    | +    | +    |     |   | + | ***   |                |      |
|                         | T           | 13-15                          |     |      |      |      |     |   |   |       |                |      |
| Rozhanovce (E, F)       | N           | 8-9                            | +   | +    |      | +    |     |   | + | ***   |                |      |

[illegible]

|  |   |       |  |      |      |      |  |  |  |     |  |  |
|--|---|-------|--|------|------|------|--|--|--|-----|--|--|
|  | F | 18.75 |  |      |      |      |  |  |  |     |  |  |
|  | M | 38.10 |  |      |      |      |  |  |  |     |  |  |
|  | T | 26.3  |  | 16.4 | 14.9 | 61.2 |  |  |  | 6.0 |  |  |

#### Explanations

Site description: E – eastern Slovakia, W – western Slovakia, SW – south-western Slovakia, C – central Slovakia, SC – south central Slovakia, E – eastern Slovakia, SE – south-eastern Slovakia, NE – north-eastern Slovakia. NS – not specified, U – urban park, UF – urban forest park, PF – peri-urban forest, F – forest, A – arboretum. Sample: N – nymph, A – adult, M – male, F – female, T – total. *B. burgdorferi* s. l. species: ss – sensu stricto, g – *garii*, v – *valaisiana*, a – *afzelii*, l – *lusitaniae*, s – *spielmanii*, b – *bavariensis*, + presence (no prevalence is given), \*\*\* *B. garii* ospA serotype 4, coinf – mixed infections. Method: DFM – dark field microscopy, IFA – immunofluorescence, PCR – polymerase chain reaction, RFLP – restriction fragment length polymorphism, IB – immunoblot, RLB – reverse line blot

#### References

20. Hanincová, K.; Taragel'ová, V.; Koči, J.; Schäfer, S.M.; Hails, R.; Ullmann, A.J.; Piesman, J.; Labuda, M.; Kurtenbach, K. Association of *Borrelia garii* and *B. valaisiana* with songbirds in Slovakia. *Appl. Environ. Microbiol.* **2003**, *69*, 2825–2830. <https://doi.org/10.1128/AEM.69.5.2825-2830.2003>
21. Taragel'ová, V.; Koči, J.; Hanincová, K.; Kurtenbach, K.; Derd'áková, M.; Ogden, N.H.; Literák, I.; Kocianová, E.; Labuda, M. Blackbirds and song thrushes constitute a key reservoir of *Borrelia garii*, the causative agent of borreliosis in central Europe. *Appl. Environ. Microbiol.* **2008**, *74*, 1289–1293. <https://doi.org/10.1128/AEM.01060-07>
23. Majláthová, V.; Majláth, I.; Vichová, B.; Derd'áková, M.; Peťko, B. *Borrelia lusitaniae* and green lizards (*Lacerta viridis*), Karst Region, Slovakia. *Emerg. Infect. Dis.* **2006**, *12*, 1895–1901. <https://doi.org/10.3201/eid1212.060784>
33. Kmety, E.; Reháček, J.; Výrosteková, V. Investigations of ticks for the presence of *Borrelia* in Czechoslovakia. *Zentralbl. Bakteriол. Mikrobiol. Hyg. A.* **1987**, *263*, 468–470. [https://doi.org/10.1016/s0176-6724\(87\)80111-6](https://doi.org/10.1016/s0176-6724(87)80111-6)
34. Drgoňová, M.; Řeháček, J. Prevalence of Lyme borrelia in ticks in Bratislava, Slovak Republic. *Cent. Eur. J. Public Health.* **1995**, *3*, 134–137.
35. Gern, L.; Hu, C.M.; Kocianova, E.; Vyrostekova, V.; Rehacek, J. Genetic diversity of *Borrelia burgdorferi* sensu lato isolates obtained from *Ixodes ricinus* ticks collected in Slovakia. *Eur. J. Epidemiol.* **1999**, *15*, 665–669. <https://doi.org/10.1023/a:1007660430664>

36. Štěpánová-Tresová, G.; Petko, B.; Štefánčíková, A.; Nadzamová, D. Occurrence of *Borrelia burgdorferi* sensu stricto, *Borrelia garini* and *Borrelia afzelii* in the *Ixodes ricinus* ticks from Eastern Slovakia. *Eur. J. Epidemiol.* **2000**, *16*, 105–109. <https://doi.org/10.1023/a:1007606623892>
37. Lenčáková, D.; Hizo-Teufel, C.; Petko, B.; Schulte-Spechtel, U.; Stanko, M.; Wilske, B.; Fingerle, V. Prevalence of *Borrelia burgdorferi* s.l. OspA types in *Ixodes ricinus* ticks from selected localities in Slovakia and Poland. *Int. J. Med. Microbiol.* **2006**, *296*(Suppl 40), 108-118. <https://doi.org/10.1016/j.ijmm.2005.12.012>
38. Pangráčová, L.; Derdáková, M.; Pekárik, L.; Hviščová, I.; Vichová, B.; Stanko, M.; Hlavatá, H.; Petko, B. *Ixodes ricinus* abundance and its infection with the tick-borne pathogens in urban and suburban areas of Eastern Slovakia. *Parasit. Vectors* **2013**, *6*, 238. <https://doi.org/10.1186/1756-3305-6-238>
39. Rusňáková Taragel'ová, V.; Mahríková, L.; Selyemová, D.; Václav, R.; Derdáková, M. Natural foci of *Borrelia lusitaniae* in a mountain region of Central Europe. *Ticks Tick Borne Dis.* **2016**, *7*, 350-356. doi: 10.1016/j.ttbdis.2015.12.006
40. Chvostáč, M.; Špitalská, E.; Václav, R.; Vaculová, T.; Minichová, L.; Derdáková, M. Seasonal patterns in the prevalence and diversity of tick-borne *Borrelia burgdorferi* sensu lato, *Anaplasma phagocytophilum* and *Rickettsia* spp. in an urban temperate forest in south western Slovakia. *Int. J. Environ. Res. Publ. Health* **2018**, *15*, 994. <https://doi.org/10.3390/ijerph15050994>
41. Vaculová, T.; Derdáková, M.; Špitalská, E.; Václav, R.; Chvostáč, M.; Rusňáková Taragel'ová, V. Simultaneous occurrence of *Borrelia miyamotoi*, *Borrelia burgdorferi* sensu lato, *Anaplasma phagocytophilum* and *Rickettsia helvetica* in *Ixodes ricinus* ticks in urban foci in Bratislava, Slovakia. *Acta Parasitol.* **2019**, *64*, 19-30. <https://doi.org/10.2478/s11686-018-00004-w>
42. Mtierová, Z.; Derdáková, M.; Chvostáč, M.; Didyk, Y.M.; Mangová, B.; Rusňáková Taragel'ová, V.; Selyemová, D.; Šujanová, A.; Václav, R. Local population structure and seasonal variability of *Borrelia garinii* genotypes in *Ixodes ricinus* ticks, Slovakia. *Int. J. Environ. Res. Publ. Health.* **2020**, *17*, 3607. <https://doi.org/10.3390/ijerph17103607>
43. Subramanian, G.; Sekeyova, Z.; Raoult, D.; Mediannikov, O. Multiple tick-associated bacteria in *Ixodes ricinus* from Slovakia. *Ticks Tick Borne Dis.* **2012**, *3*, 406-410. <https://doi.org/10.1016/j.ttbdis.2012.10.001>
80. Nadzamová, D.; Petko, B.; Štefánčíková, A.; Cisláková, L.; Štěpánová, G.; Seba, M. Potential foci of Lyme borreliosis in towns. *Cent. Eur. J. Publ. Health* **2000**, *8*, 176-178.

81. Pet'ko, B.; Štefančíková, A.; Nadzamová, D.; Stanko, M.; Siuda, K.; Karbowski, G.; Winiarczyk, S. Epizootiological aspects of Lyme borreliosis in the city agglomerations of the Carpathian regions of Slovakia and Poland and their peripheral parts. In *Stawonogi Pasożyty i nosiciele*; Buczek A., Błaszak C., Eds.; Wyd. KGM: Lublin, Poland, 2001; pp. 157-164.
82. Derdakova, M.; Halanova, M.; Stanko, M.; Stefancikova, A.; Cislakova, L.; Pet'ko, B. Molecular evidence for *Anaplasma phagocytophilum* and *Borrelia burgdorferi* sensu lato in *Ixodes ricinus* ticks from eastern Slovakia. *Ann. Agric. Environ. Med.* **2003**, *10*, 269-271.
83. Smetanová, K.; Schwarzová, K.; Kocianová, E. Detection of *Anaplasma phagocytophilum*, *Coxiella burnetti*, *Rickettsia* spp., and *Borrelia burgdorferi* s.l. in ticks and wild living animals in western and middle Slovakia. *Ann. N. Y. Acad. Sci.* **2006**, *1078*, 312–315. <https://doi.org/10.1196/annals.1374.058>
84. Smetanová, K.; Burri, C.; Pérez, D.; Gern, L.; Kocianová, E. Detection and identification of *Borrelia burgdorferi* sensu lato genospecies in ticks from three different regions in Slovakia. *Wien. Klin. Wochenschr.* **2007**, *119*, 534–537. <https://doi.org/10.1007/s00508-007-0851-y>
