# Supplementary material for: Spatial and Temporal Variability in Prevalence Rates of Members of the Borrelia burgdorferi Species Complex in Ixodes ricinus Ticks in Urban, Agricultural and Sylvatic Habitats in Slovakia
Source: MDPI journal article supplement (doi:10.3390/microorganisms11071666), 2023-06-27
Supplement: s1 [file s1]

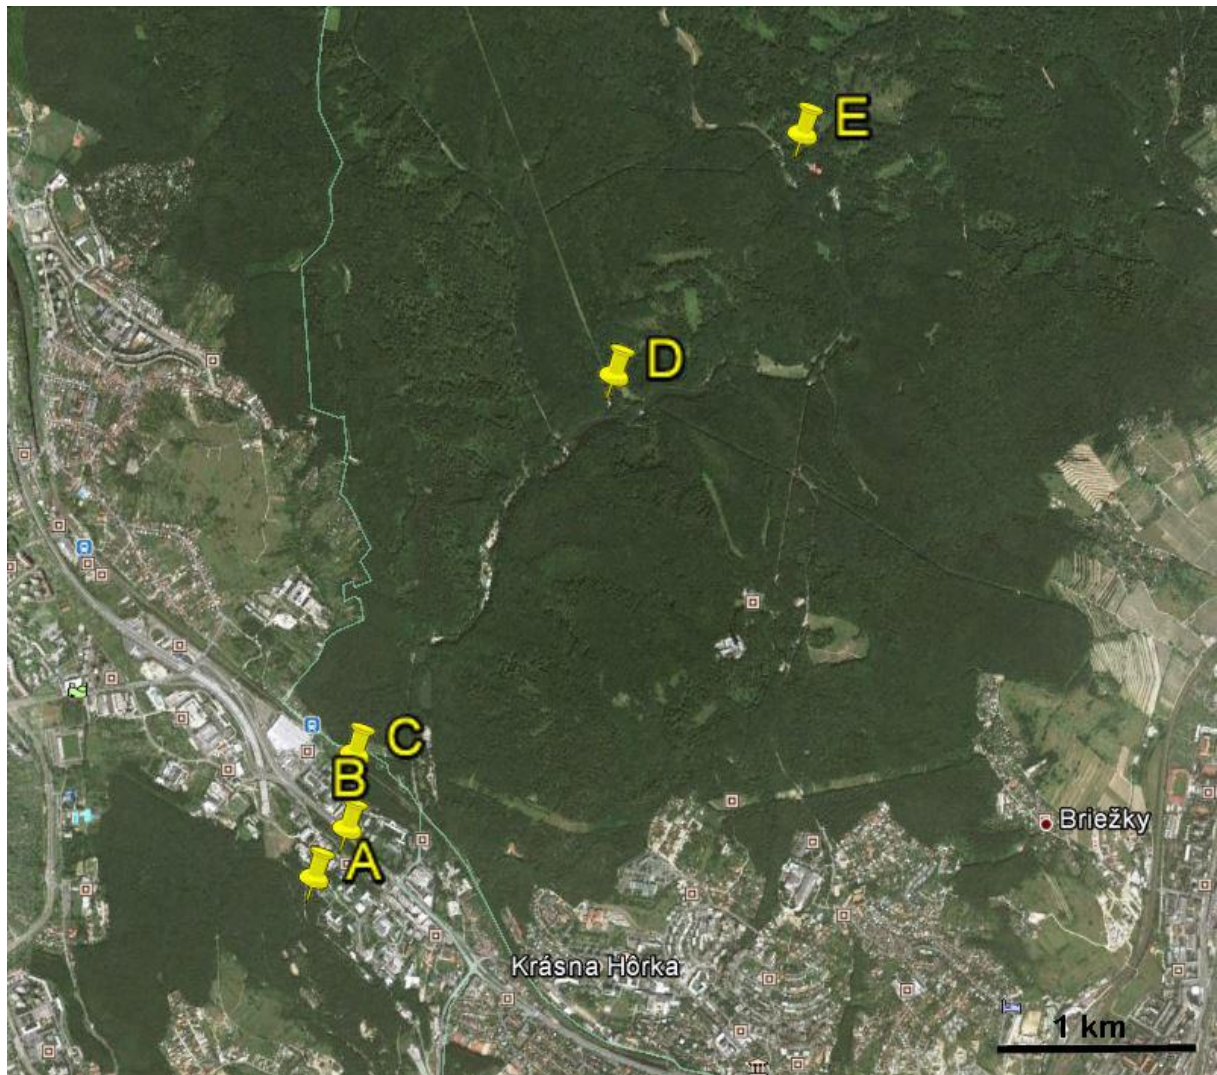

**Figure S1** Localisation of transects in Bratislava (urban/suburban habitat) for tick collection in 2011
