# Supplementary material for: Spatial and Temporal Variability in Prevalence Rates of Members of the Borrelia burgdorferi Species Complex in Ixodes ricinus Ticks in Urban, Agricultural and Sylvatic Habitats in Slovakia
Source: MDPI journal article supplement (doi:10.3390/microorganisms11071666), 2023-06-27
Supplement: s1 [file s1]

|                              |                  |           |            |            |            |           |           |           |          |          |          |          |          |            |
|------------------------------|------------------|-----------|------------|------------|------------|-----------|-----------|-----------|----------|----------|----------|----------|----------|------------|
|                              | Females          | 1         |            | 1          | 1          |           |           |           |          |          |          |          |          | <b>3</b>   |
|                              | Males            |           |            |            | 2          |           |           |           |          |          |          |          |          | <b>2</b>   |
|                              | Total            | 2         | 3          | 10         | 10         |           |           |           |          |          |          |          |          | <b>25</b>  |
| Total                        | 2011-2013        | 13        | 53         | 38         | 29         | 8         | 1         | 6         | 1        |          |          | 1        | 1*, 2**  | <b>153</b> |
| <b>TOTAL<br/>(all sites)</b> | <b>2011-2013</b> | <b>31</b> | <b>277</b> | <b>258</b> | <b>113</b> | <b>47</b> | <b>16</b> | <b>12</b> | <b>1</b> | <b>1</b> | <b>1</b> | <b>1</b> | <b>7</b> | <b>765</b> |

*Borrelia burgdorferi* s.l. species. Results of RFLP: ss – sensu stricto, a – *afzelii*, g – *garinii* (+ *bavariensis*), v – *valaisiana*, l – *lusitaniae*, s – *spielmanii*. Results of RLB: g+v – *garinii*+*valaisiana*, a+g – *afzelii*+*garinii*, a+g+v – *afzelii*+*garinii*+*valaisiana*, ss+g – sensu stricto+*garinii*, ss+g+v+k – sensu stricto+*garinii*+*valaisiana*+*kurtenbachii*,

\* the RFLP profile indicated coinfections, but only *B. garinii* could be identified with RLB, \*\*the RFLP profile indicated coinfections but no samples were left for RLB analysis.
